# Supplementary material
Source: MDPI journal article supplement (https://www.mdpi.com/2073-4344/12/1/39)
Supplement: s1 [file s1]

# Hierarchical Graphitic Carbon Encapsulating Cobalt Nanoparticles for Catalytic Hydrogenation of 2,4-Dinitrophenol

Hassan H. Hammud <sup>1,\*</sup>, Hassan Traboulsi <sup>1,\*</sup>, Ranjith Kumar Karnati <sup>1</sup>, Syed Ghazanfar Hussain <sup>2</sup> and Esam Bakir <sup>1,3</sup>

<sup>1</sup> Department of Chemistry, College of Science, King Faisal University, P.O. Box 400, Al-Ahsa 31982, Saudi Arabia; Rkarnati@kfu.edu.sa (R.K.K.); ebakir@kfu.edu.sa (E.B.)

<sup>2</sup> Department of Physics, College of Science, King Faisal University, P.O. Box 400, Al-Ahsa 31982, Saudi Arabia; sghazanfar@kfu.edu.sa

<sup>3</sup> Department of Chemistry, Faculty of Science, Ain shams University, Cairo 11566, Egypt

\* Correspondence: hhammoud@kfu.edu.sa (H.H.H.); htraboulsi@kfu.edu.sa (H.T.)

## Supplementary Materials

**Table S1.** Effect of experimental conditions on the microscopic structure of the obtained cobalt carbon nanomaterials. In all the carbon source is anthracene, except pyrene was used in (B). All under nitrogen atmosphere except C under vacuum. Only the crucible in the case of (1) was not covered.

| Sample number | Temperature | Time of Stage Heating | % yield | Results                                                                                                        | SEM                                                                                   |
|---------------|-------------|-----------------------|---------|----------------------------------------------------------------------------------------------------------------|---------------------------------------------------------------------------------------|
| A             | 500 °C      | 8h                    | 65%     | 50-150 nm cobalt nanoparticles undeveloped beneath amorphous carbon layer<br><br>Few nanoparticles are exposed | 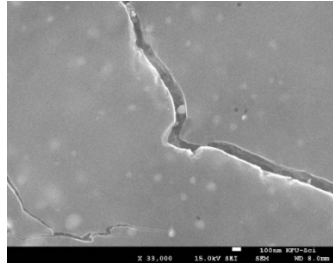 |
| B             | 600 °C      | 5 h                   | 59%     | Few nanoparticles of irregular size with 270 nm width<br><br>Effect of type of carbon source                   |  |
| C             | 600 °C      | 5 h                   | 20%     | Grey ash                                                                                                       | -                                                                                     |

|          |        |              |     |                                                                                                                                                                                                                                |                                                                                                                                                                               |
|----------|--------|--------------|-----|--------------------------------------------------------------------------------------------------------------------------------------------------------------------------------------------------------------------------------|-------------------------------------------------------------------------------------------------------------------------------------------------------------------------------|
| D        | 600 °C | 5 h<br>Short | 56% | -D1 Cobalt nanoparticles 100 nm in graphite sheets<br><br>Other agglomerated into several micrometer spheroid particles                                                                                                        | 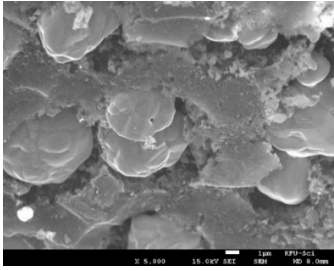                                                                                           |
| E        | 600 °C | 10 h<br>long | 38% | Cobalt agglomerated particles 5-10 micrometer on top of carbon amorphous layer, few cobalt nanoparticles embedded in carbon layer. Longer heating caused more agglomeration of cobalt nanoparticles into micro sized particles |                                                                                            |
| (1)      | 600 °C | 8 h          |     | 100-2000 nm cobalt particles embedded in not fully developed graphite support                                                                                                                                                  | <br> |
| (1)-acid |        |              |     | (1)-acid When (1) was treated with 10% HCl the white cobalt particles were removed                                                                                                                                             |                                                                                          |

|     |                  |                                 |     |                                                              |                                                                                                                                                                            |
|-----|------------------|---------------------------------|-----|--------------------------------------------------------------|----------------------------------------------------------------------------------------------------------------------------------------------------------------------------|
| (2) | 300 °C<br>600 °C | 3h<br>8 h<br>Intermediate stage | 37% | 50-1000 nm cobalt nanoparticles embedded in graphite support | 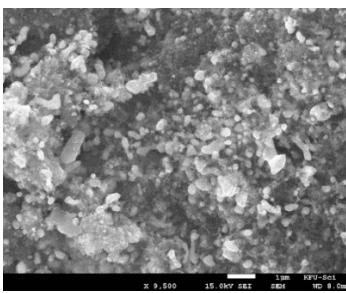     |
| (3) | 800 °C           | 5 h                             | 38  | Silver Metallic Nanoparticles 10-100 nm in graphene sheets   |   |
| E   | 1000 °C          | 10h                             | 18% | White grey ash                                               | -                                                                                                                                                                          |

|         |                                                                                                                                    |                                                                                                        |
|---------|------------------------------------------------------------------------------------------------------------------------------------|--------------------------------------------------------------------------------------------------------|
| (1)H    | 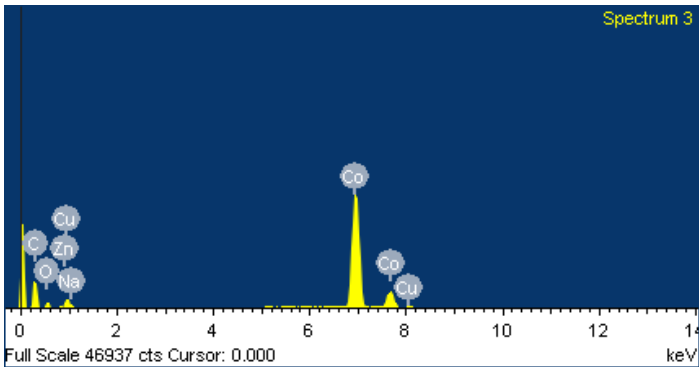 <p>Full Scale 46937 cts Cursor: 0.000 keV</p>   | <p>Element<br/>(Aomic %)</p> <p>C 64.94</p> <p>O 5.00</p> <p>Cl 0.13</p> <p>Co 28.55</p>               |
| (1)L    |  <p>Full Scale 46937 cts Cursor: 0.000 keV</p>  | <p>Element<br/>(Aomic %)</p> <p>C 82.54</p> <p>N 9.91</p> <p>O 3.32</p> <p>Cl 1.46</p> <p>Co 2.63</p>  |
| (1)acid |  <p>Full Scale 21788 cts Cursor: 0.000 keV</p> | <p>Element<br/>(Aomic %)</p> <p>C 81.12</p> <p>N 10.13</p> <p>O 3.45</p> <p>Cl 3.38</p> <p>Co 1.80</p> |
| (2)     |  <p>Full Scale 46937 cts Cursor: 0.000 keV</p> | <p>Element<br/>(Aomic %)</p> <p>C 76.30</p> <p>N 7.30</p> <p>O 3.83</p> <p>Cl 1.26</p> <p>Co 10.75</p> |

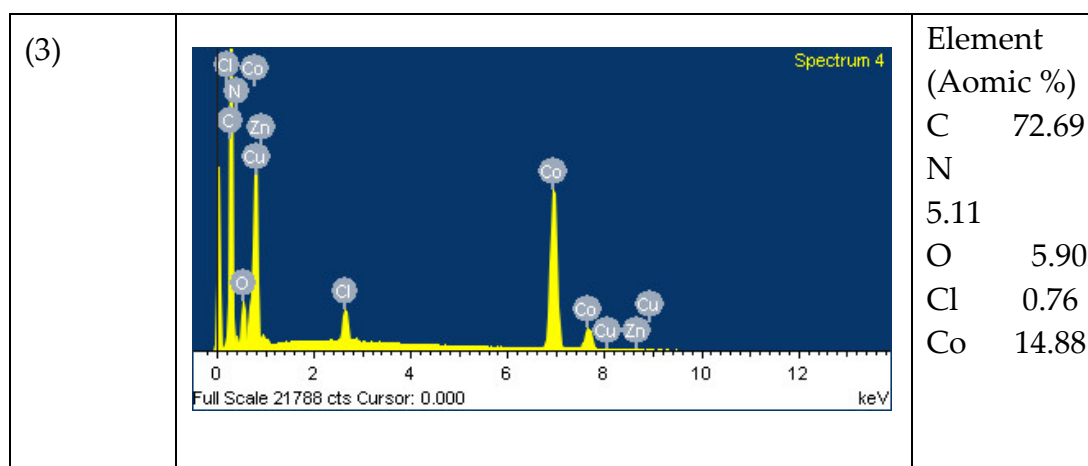

**Figure S1.** SEM-EDX spectrum of catalysts (1), (2) and (3). Where (1)H is for high %Co area and (1)L is for low %Co area. (1)-acid is (1) treated with 10% HCl.

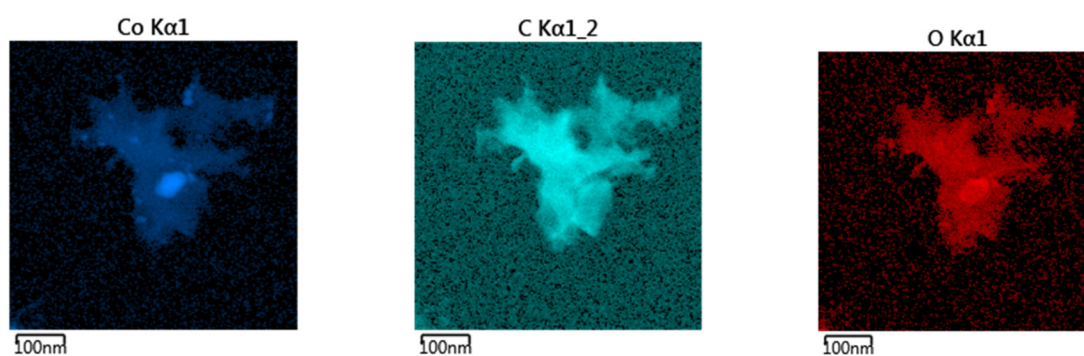

EDX of (1)

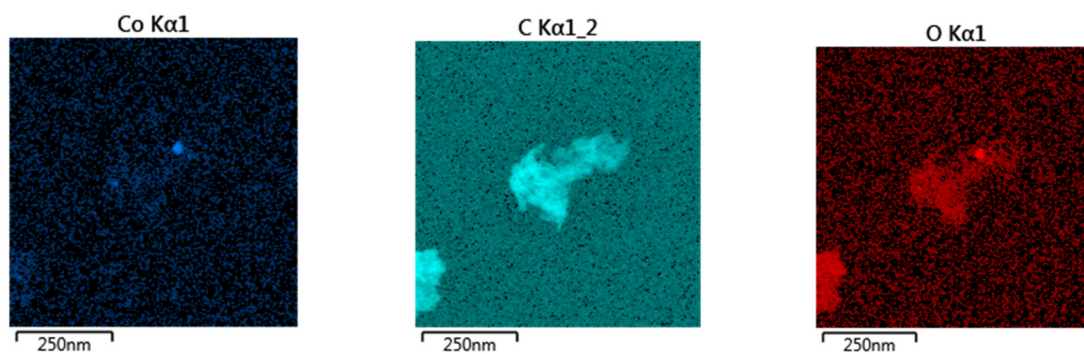

EDX of (3)

**Figure S2.** TEM-EDX of nano-catalysts (1) and (3).

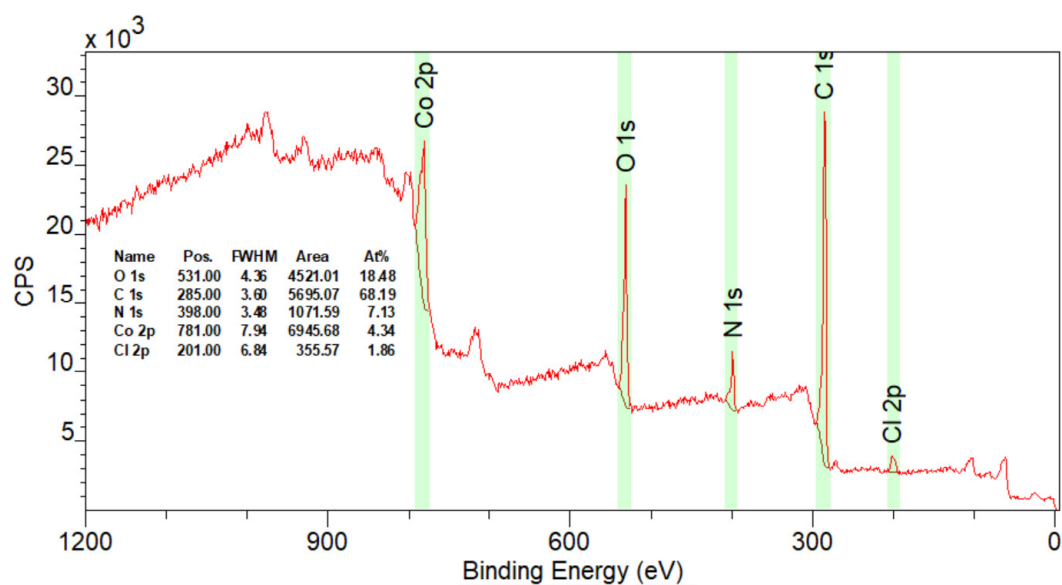

(a) XPS survey spectrum of (1).

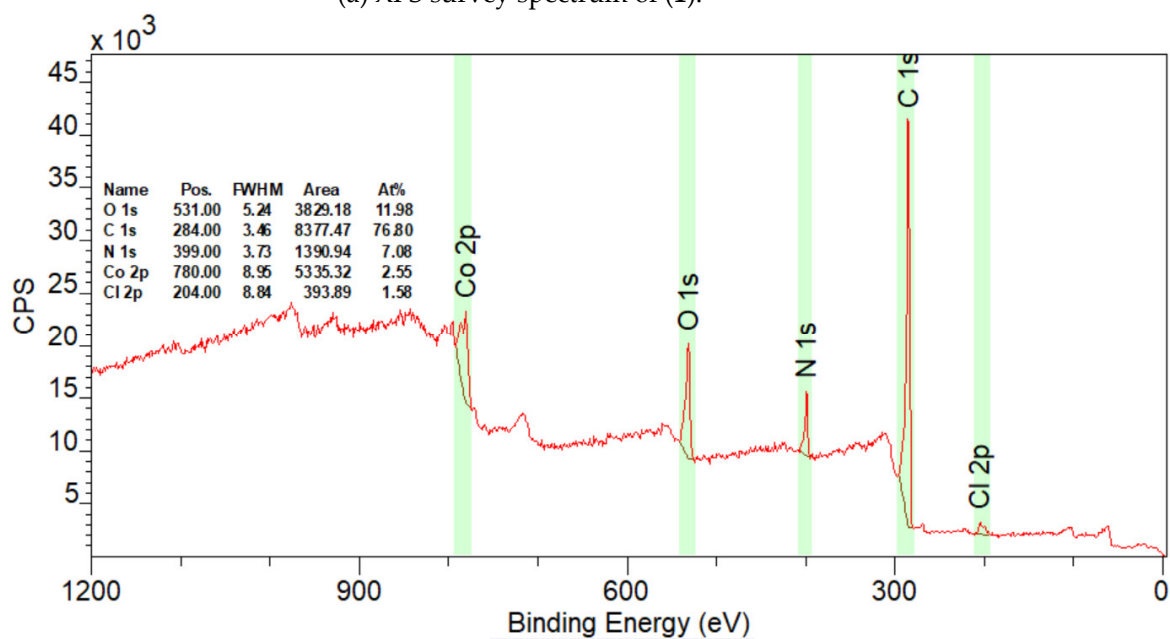

(b) XPS survey spectrum of (2).



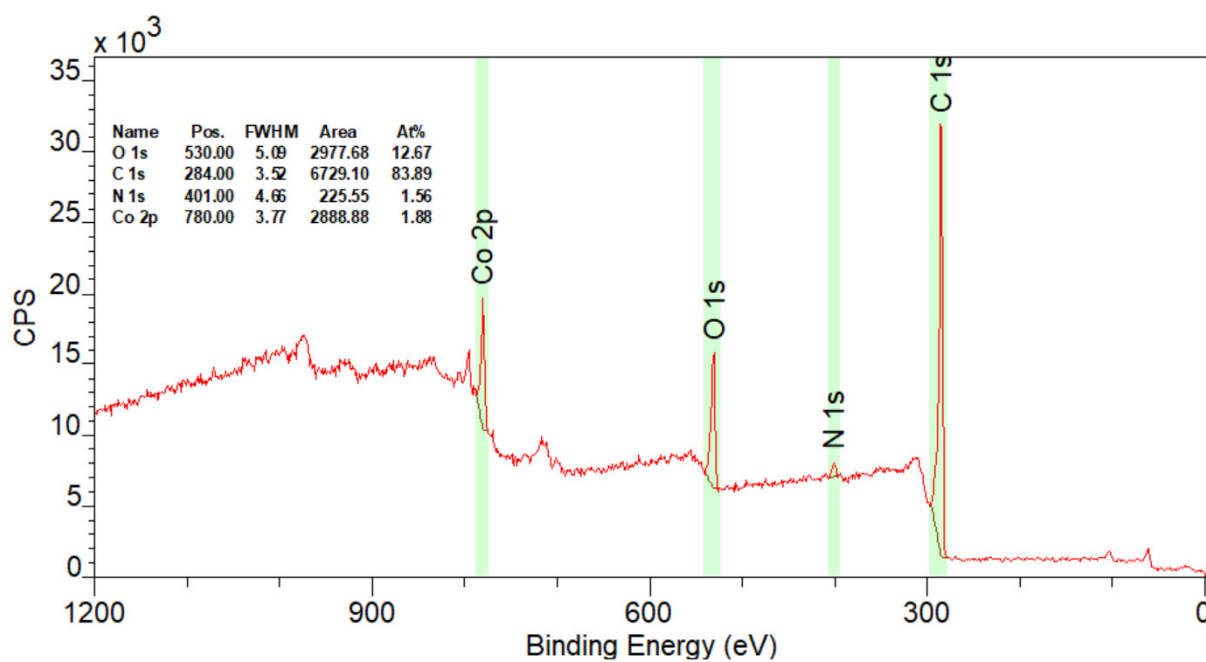

(c) XPS survey spectrum of (3).

**Figure S3.** a) b) and c) XPS survey spectrum of nano-catalyst of (1), (2) and (3) respectively.

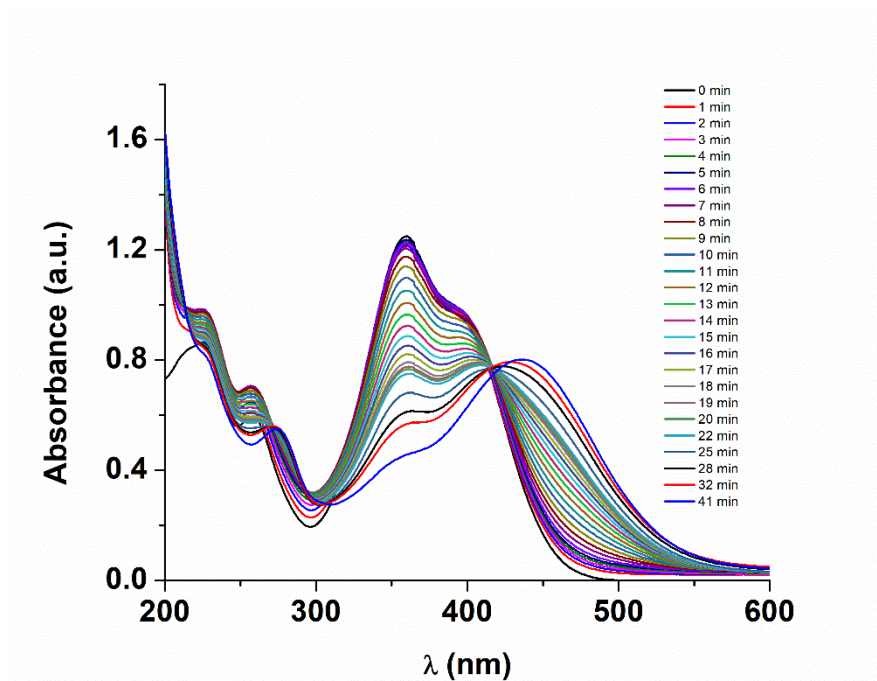

**Figure S4.** Time-dependent UV-visible absorption spectrum for the reduction of DNP with  $\text{NaBH}_4$  in the presence of nano-catalyst (1). Solvent: Water,  $[\text{DNP}] = 8.5 \times 10^{-5} \text{ M}$ ;  $[\text{NaBH}_4] = 0.003 \text{ M}$ ;  $\ell = 1 \text{ cm}$ ;  $T = 25^\circ\text{C}$ ; 0.18 mg/ml of catalyst was used.

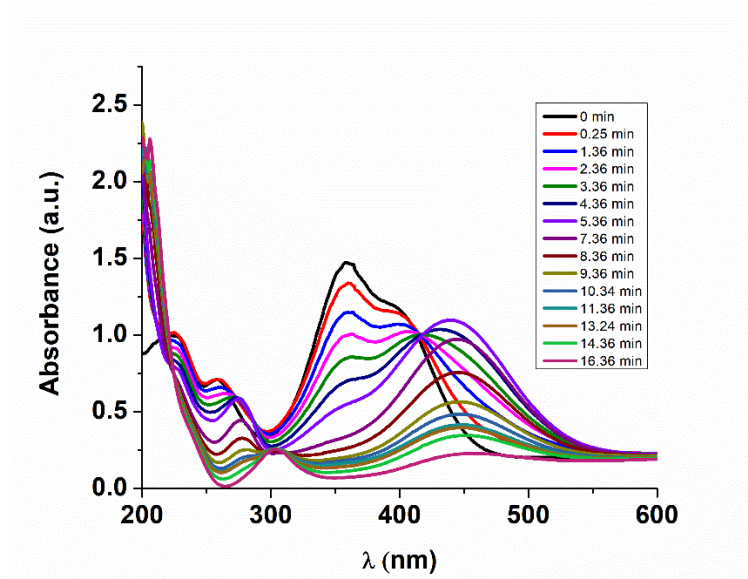

**Figure S5.** Time-dependent UV-visible absorption spectrum for the reduction of DNP with NaBH<sub>4</sub> in the presence of nano-catalyst (3). Solvent: Water, [DNP] =  $8.5 \times 10^{-5}$  M; [NaBH<sub>4</sub>] = 0.003 M;  $\ell$  = 1 cm; T = 25°C; 0.18 mg/ml of catalyst was used.

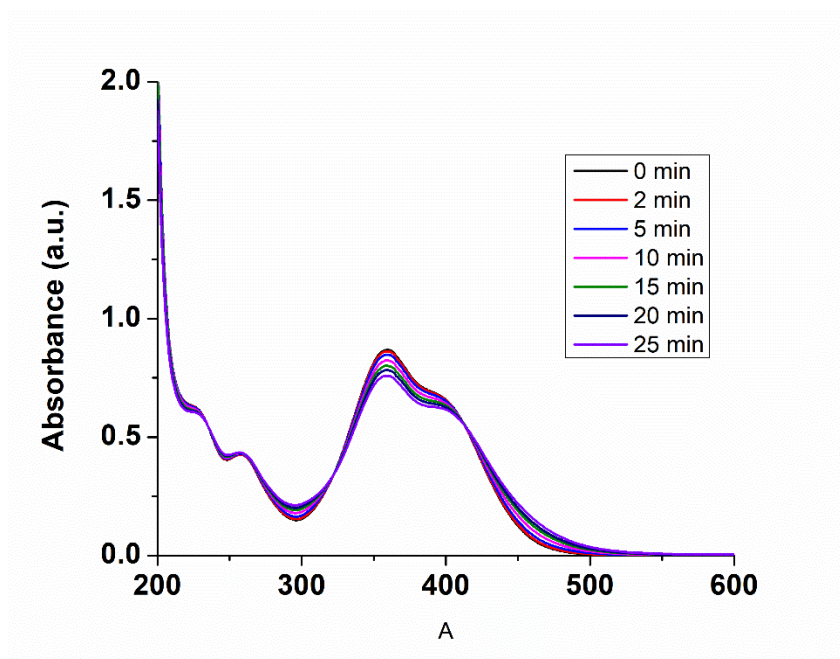

**Figure S6.** Time-dependent UV-visible absorption spectrum for the reduction of DNP with NaBH<sub>4</sub> in absence of catalyst. Solvent: Water, [DNP] =  $8.5 \times 10^{-5}$  M; [NaBH<sub>4</sub>] = 0.003 M;  $\ell$  = 1 cm; T = 25°C.



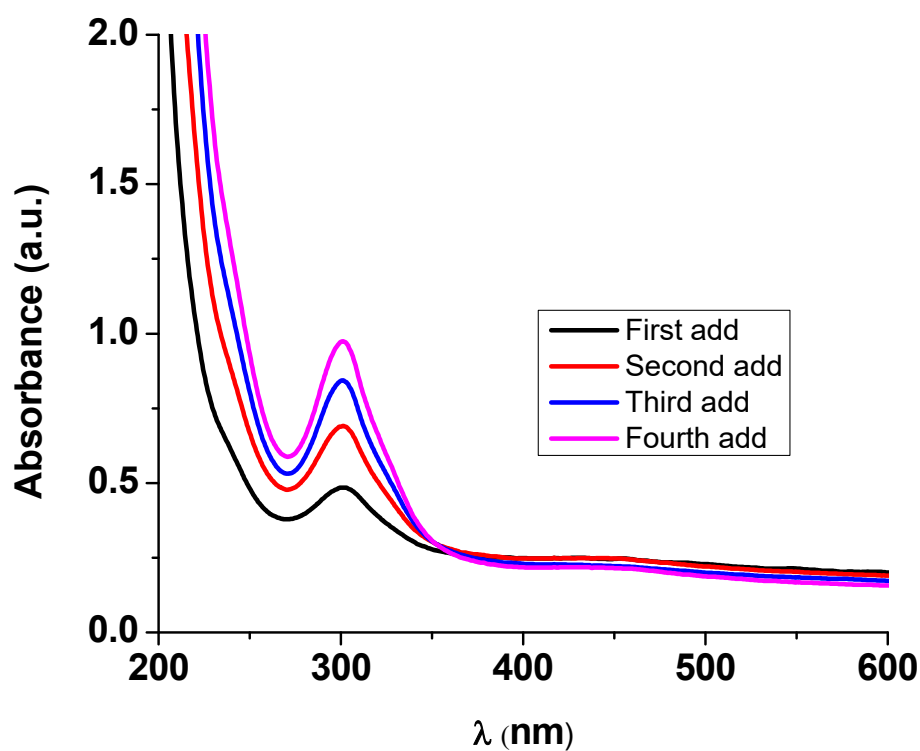

**Figure S7.** After regeneration of (2): complete reduction for new four successive cycles of addition of 50 mL of 2,4-dinitrophenol ( $4.4 \times 10^{-3}$  M). Catalyst: 0.2 mg/mL. Solvent: Water 3 mL;  $[\text{NaBH}_4] = 0.017$  M;  $T = 25^\circ\text{C}$ .

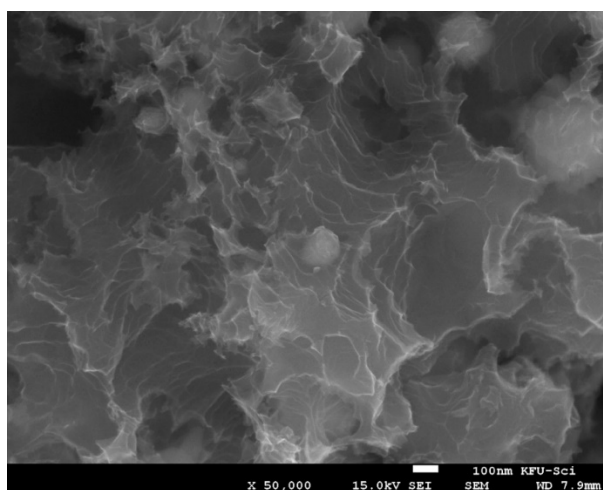

**Figure S8.** SEM of the used catalyst (1).

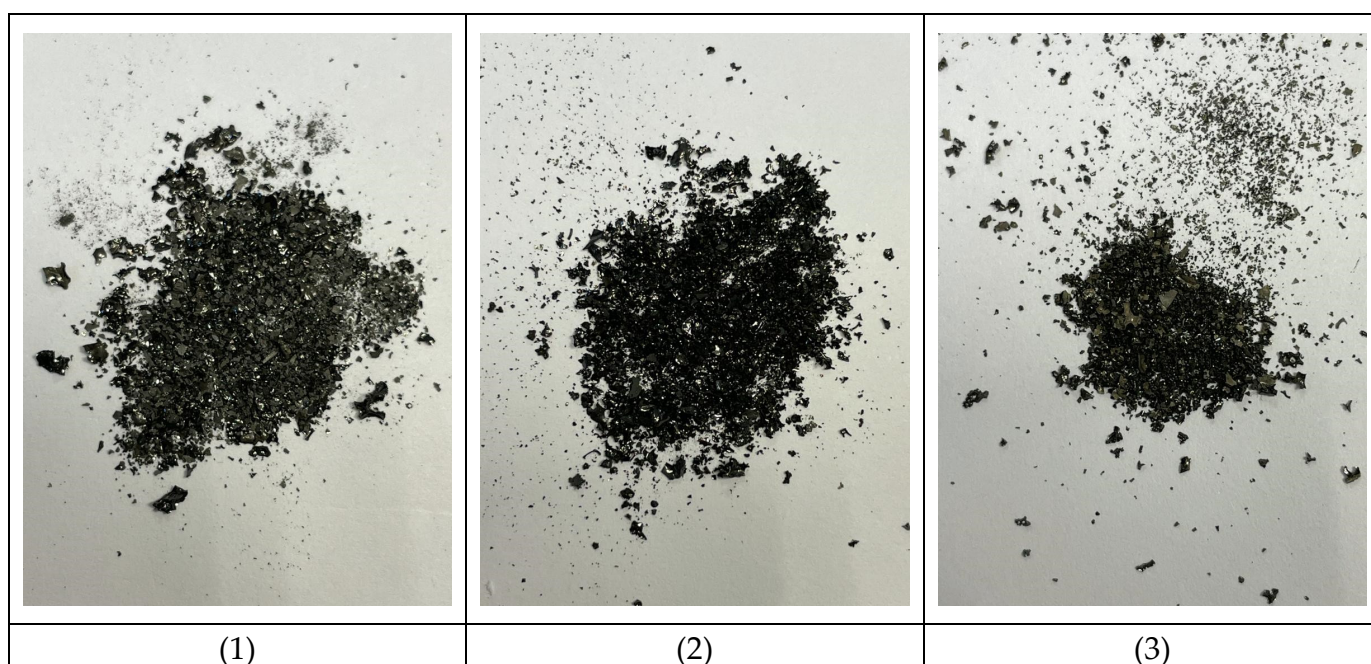

**Figure S9.** Image of cobalt hierarchical carbon nanomaterials Co@HGC catalyst (1), (2) and (3).

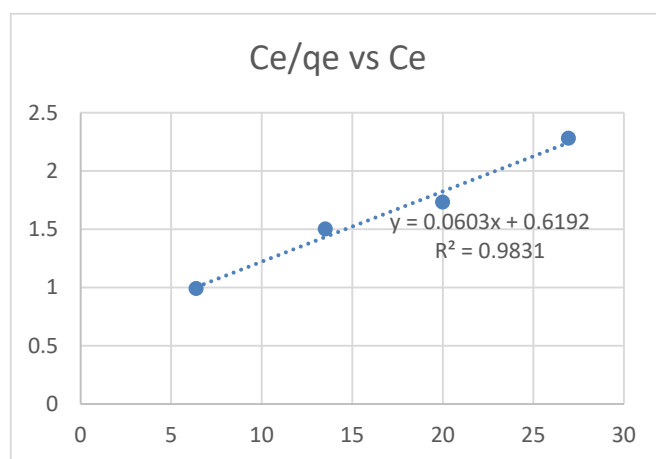

**Figure S10.** Langmuir adsorption isotherm for 2,4-DNP by catalyst (3). Where  $C_e$  (mg/L) is the remaining concentration of 2,4-DNP and  $q_e$  (mg/g) is the experimental capacity.

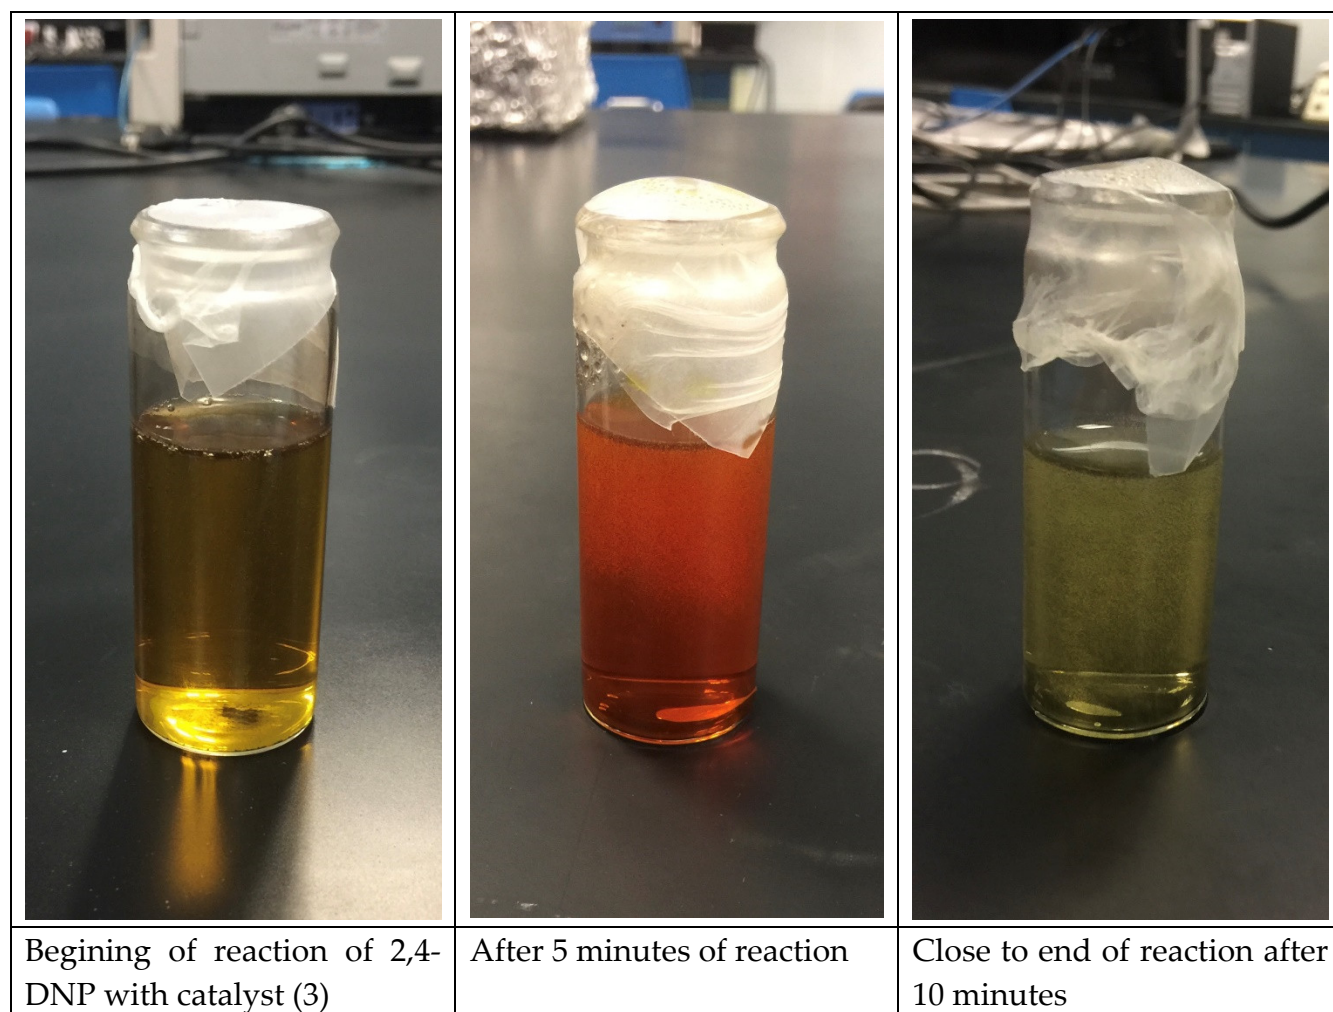

**Figure S11.** Tracked observation of hydrogen gas generation during reduction experiment of 2,4-DNP by catalyst (3) in presence of sodium borohydride.
